# Supplementary material
Source: MDPI journal article supplement (https://www.mdpi.com/1424-8220/14/6/9720)
Supplement: s1 [file s1]

Supplementary Information

## Analysis of Benzo[a]pyrene in Vegetable Oils Using Molecularly Imprinted Solid Phase Extraction (MISPE) Coupled with Enzyme-Linked Immunosorbent Assay (ELISA)

Michael Pschenitza <sup>1</sup>, Rudolf Hackenberg <sup>2</sup>, Reinhard Niessner <sup>1</sup> and Dietmar Knopp <sup>1,\*</sup>

<sup>1</sup> Institute of Hydrochemistry and Chemical Balneology, Chair for Analytical Chemistry, Technische Universität München, Marchioninistrasse 17, 81377 Munich, Germany; E-Mails: michael.pschenitza@mytum.de (M.P.); reinhard.niessner@ch.tum.de (R.N.)

<sup>2</sup> Bundesamt für Verbraucherschutz und Lebensmittelsicherheit, Standort Marienfelde, Diedersdorfer Weg 1, 12277 Berlin, Germany; E-Mail: rudolf.hackenberg@bvl.bund.de

\* Author to whom correspondence should be addressed; E-Mail: dietmar.knopp@ch.tum.de; Tel.: +49-89-2180-78252; Fax: +49-89-2180-78255.

**Figure S1.** Infrared spectra of sample (olive oil, diluted 1:1 with *n*-hexane) and respective washing fractions for estimation of fatty acid concentrations. Solvents used for washing are *n*-hexane, isopropanol, ethyl acetate and acetonitrile. For ethyl acetate, washing efficiency was estimated by alkyl bands (2750–3000 cm<sup>-1</sup>, see Figure S2), for all other solvents the C–O peak at about 1750 cm<sup>-1</sup> was used.

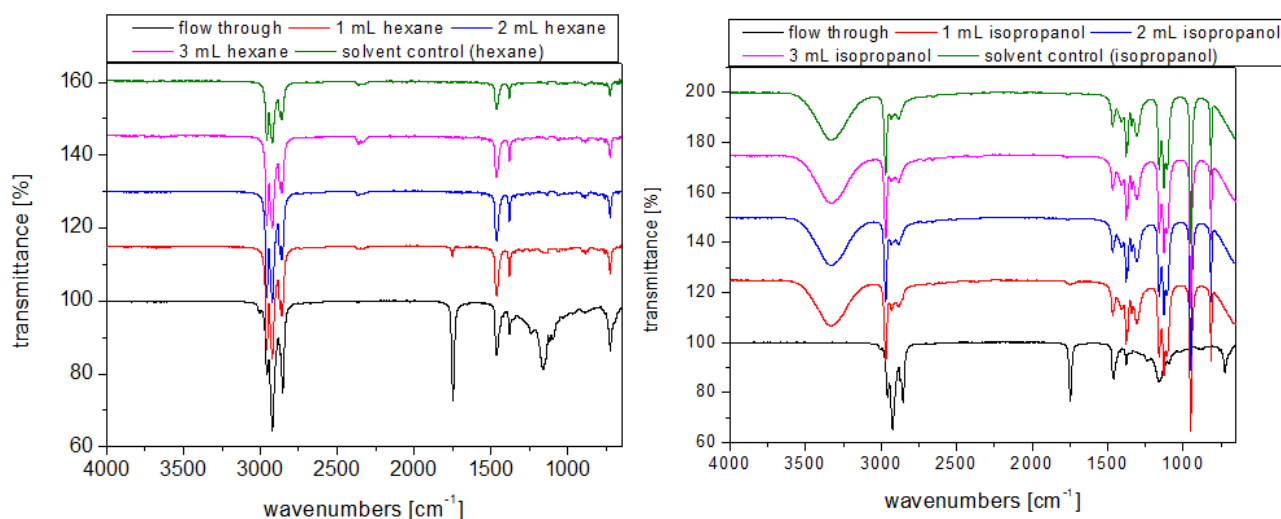

Figure S1. Cont.

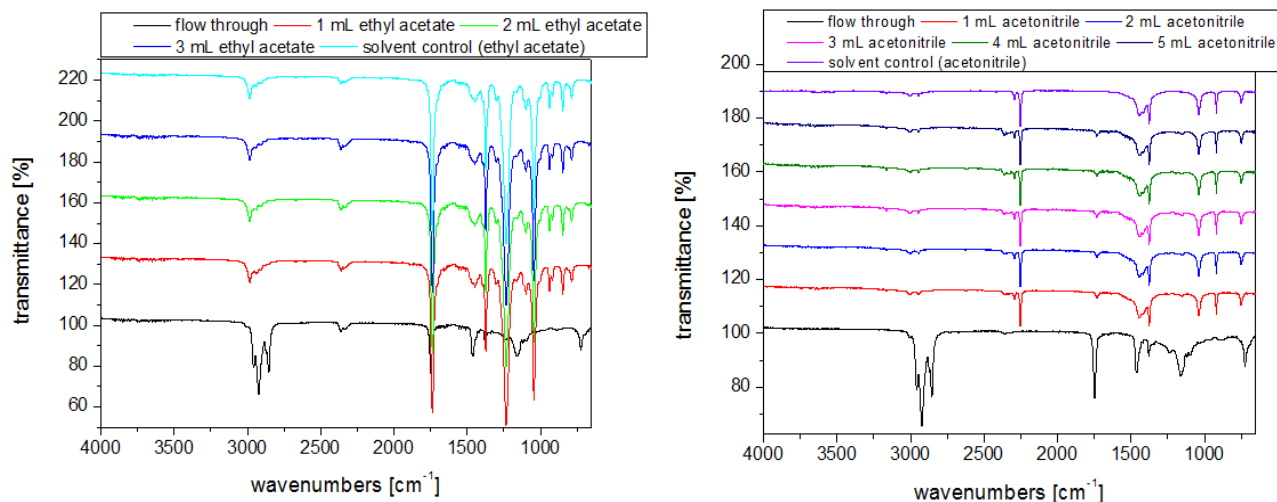

**Figure S2.** Infrared spectra of sample (olive oil, diluted 1:1 with *n*-hexane) and washing fractions for ethyl acetate enlarged for alkyl vibrations.

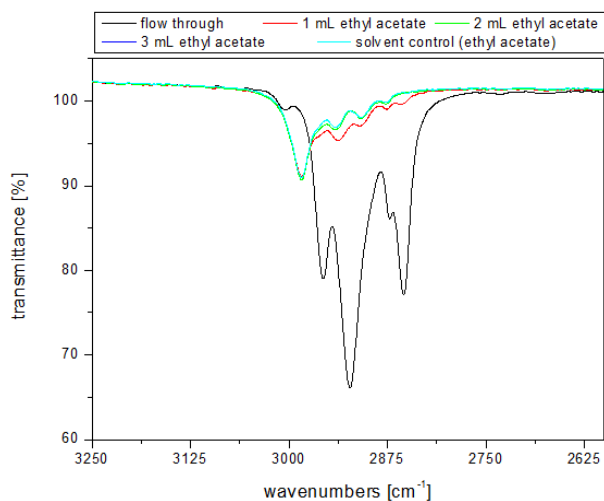

**Figure S3.** UV/V is spectra of sample (olive oil, diluted 1:1 with *n*-hexane) and washing fractions for estimation of pigment content (400–500 nm and 600–700 nm). Solvents were the same as above.

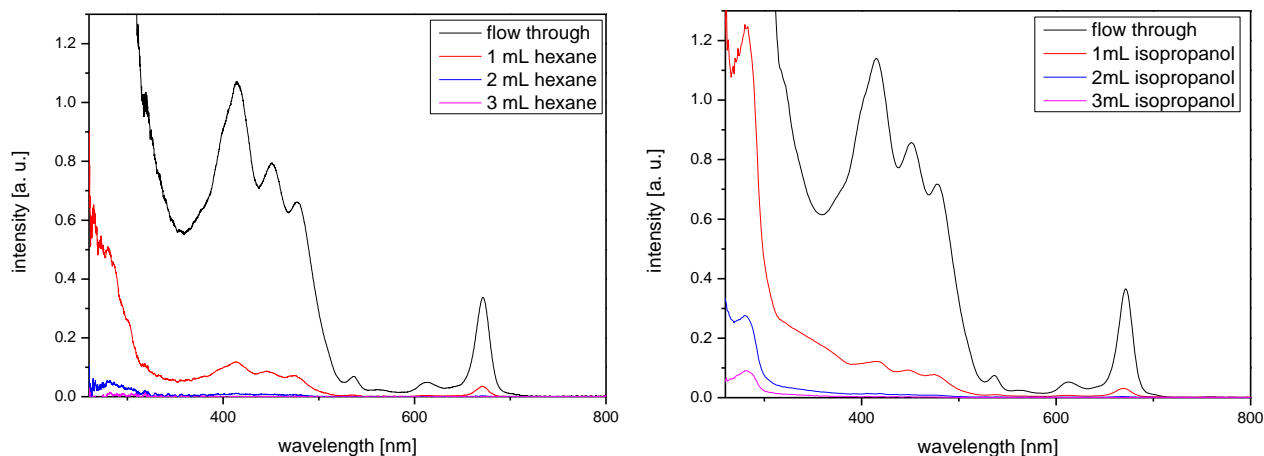

Figure S3. Cont.

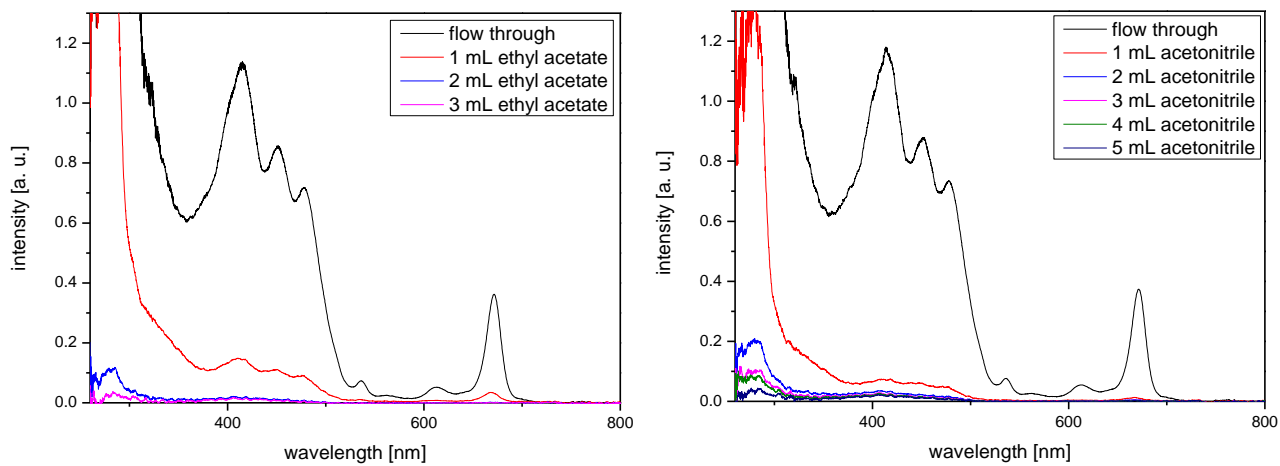

© 2014 by the authors; licensee MDPI, Basel, Switzerland. This article is an open access article distributed under the terms and conditions of the Creative Commons Attribution license (<http://creativecommons.org/licenses/by/3.0/>).
